# Supplementary material for: NaCl-Templated Ultrathin 2D-Yttria Nanosheets Supported Pt Nanoparticles for Enhancing CO Oxidation Reaction
Source: MDPI journal article supplement (doi:10.3390/nano12132306), 2022-07-05
Supplement: s1 [file s1]

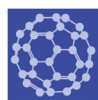

## Supplementary Information

# NaCl-Templated Ultrathin 2D-Yttria Nanosheets Supported Pt Nanoparticles for Enhancing CO Oxidation Reaction

Luozen Jiang <sup>†</sup>, Chen Tian <sup>†</sup>, Yunan Li, Rui Si, Meng Du, Xiuhong Li <sup>\*</sup>, Lingling Guo <sup>\*</sup> and Lina Li <sup>\*</sup>

Shanghai Advanced Research Institute, Chinese Academy of Sciences, Shanghai 201210, China; lzjiang@mail.usc.edu.cn (L.J.); tianchen@sinap.ac.cn (C.T.); liyunan@sinap.ac.cn (Y.L.); sirui@mail.sysu.edu.cn (R.S.); dum@sari.ac.cn (M.D.)

<sup>\*</sup> Correspondence: lixiuhong@zjlab.org.cn (X.L.); guolingling@zjlab.org.cn (L.G.); lilina@sinap.ac.cn (L.L.)

<sup>†</sup> These authors contributed equally to this work.

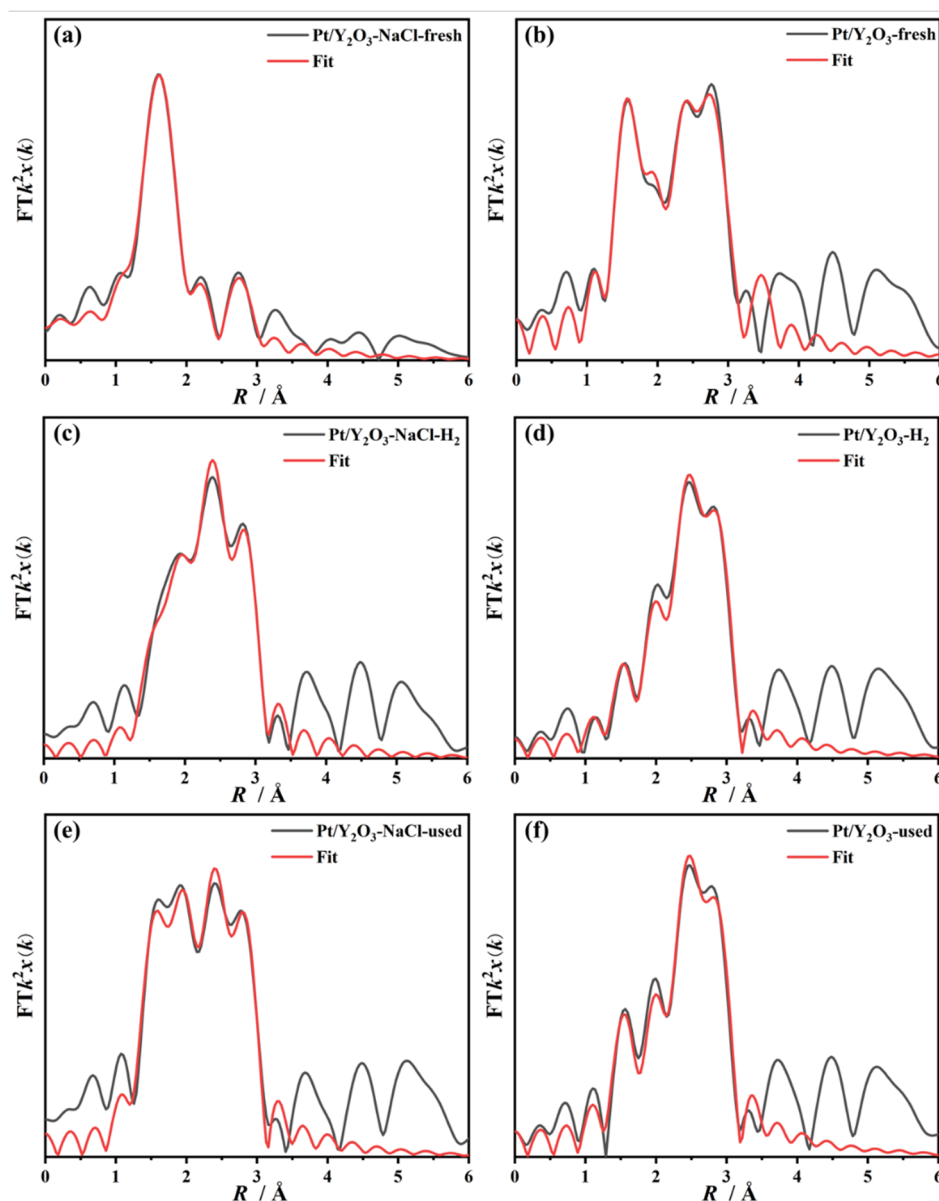

Figure S1. EXAFS fitting curves in R space of Pt/Y<sub>2</sub>O<sub>3</sub> and Pt/Y<sub>2</sub>O<sub>3</sub>-NaCl catalysts.

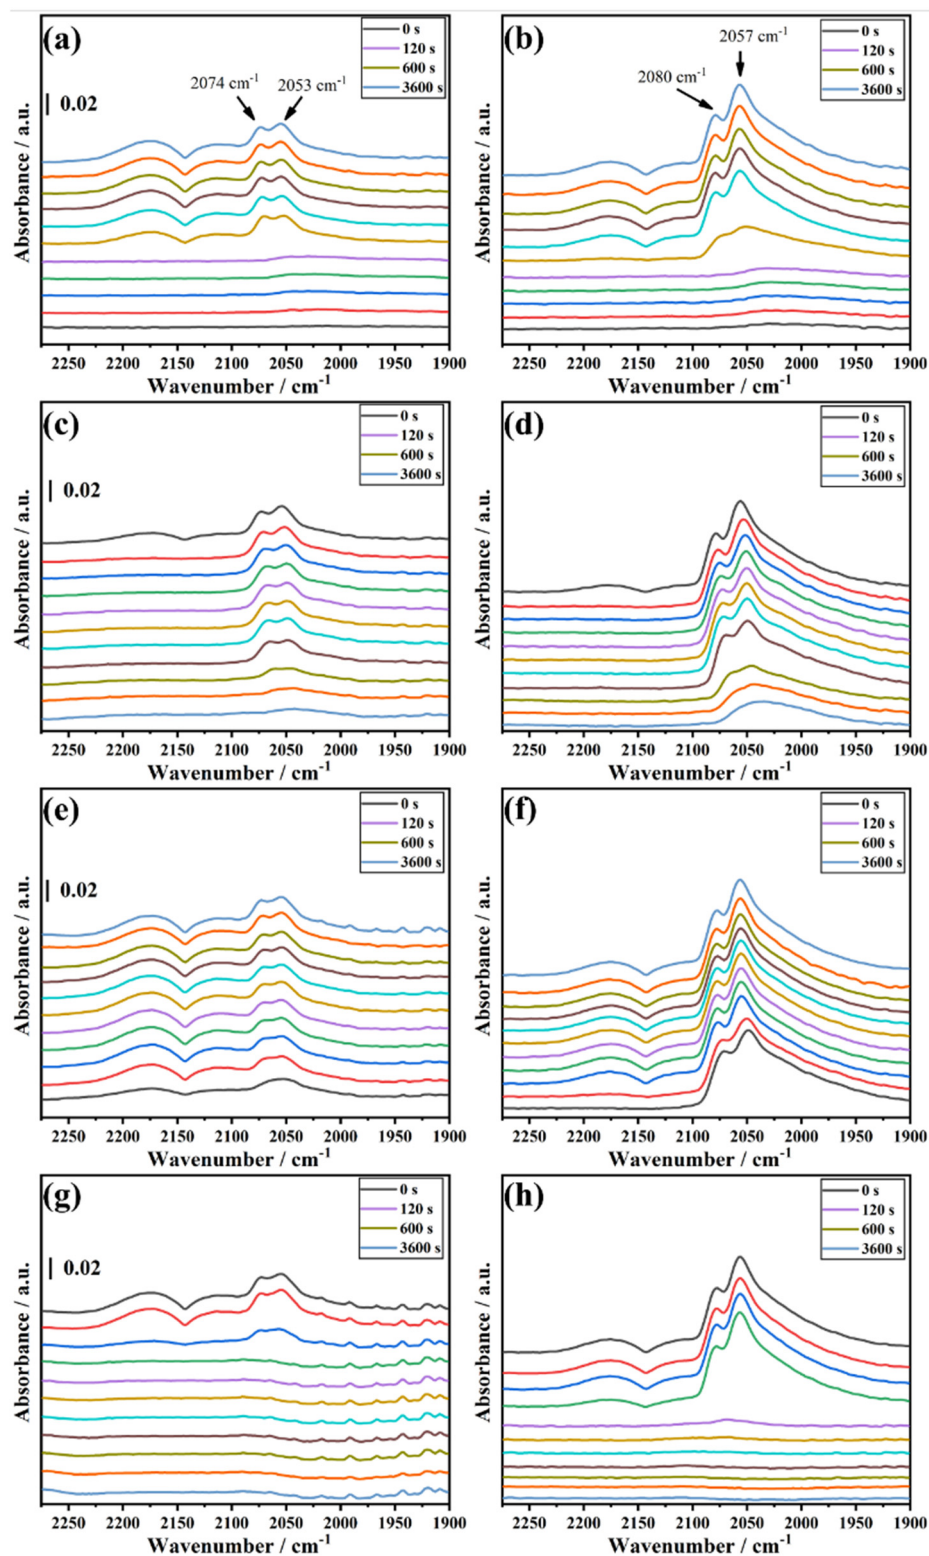

**Figure S2.** *In situ* DRIFTS of Pt/Y<sub>2</sub>O<sub>3</sub> (a,c,e,g) and Pt/Y<sub>2</sub>O<sub>3</sub>-NaCl (b,d,f,h) catalysts during CO adsorption-desorption: (a,b) CO adsorption; (c,d) N<sub>2</sub> purging; (e,f) CO resorption; (g,h) O<sub>2</sub> removal.
